# Supplementary material
Source: PubMed Central journal article supplement (PMC3304471)
Supplement: NIHMS313009-supplement-1.pdf [file NIHMS313009-supplement-1.pdf]

Supplementary Figures, Legends, and Tables.

Figure S1

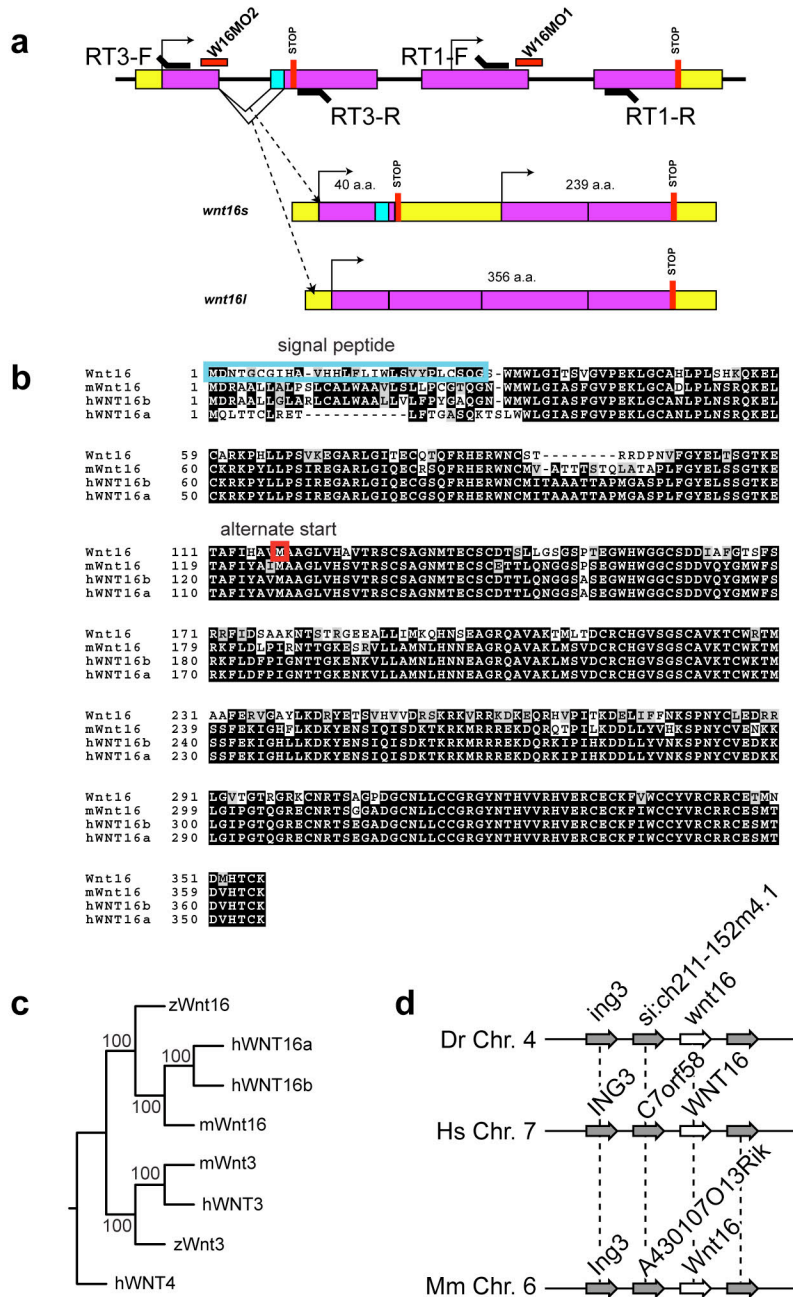

**Supplementary Figure 1. Characterization of the zebrafish *wnt16* orthologue.** a) Genomic structure of the zebrafish *wnt16* locus and mRNA splice variants, with 5'- and 3'-UTR (yellow) and open reading frames (ORFs; purple) found on four exons (top). Locations of the splice junctions blocked by W16MO1 and W16MO2 are indicated, as are locations of RT-PCR primers described in the text. Alternative splice acceptors are found 52 bps apart (blue box) in the second exon. Splicing to the 5'-acceptor yields two ORFs (middle, *wnt16s*): a highly truncated 5'-ORF that encodes a peptide of 40 amino acids, and a downstream ORF encoding a short-form protein of 239 amino acids, lacking a putative signal peptide, that exhibits no biological activity when injected (Fig. S2). Splicing to the more 3'-splice acceptor results in a message (bottom, *wnt16l*) with an ORF encoding a

predicted protein of 356 amino acids that has biological activity when injected (Fig. S3); high homology to mouse Wnt16, as well as human WNT16a and WNT16b (b); and a predicted signal peptide (boxed in turquoise). c) Phylogenetic cosegregation of zebrafish Wnt16 with mammalian Wnt16 proteins, as determined using PHYLIP software and bootstrap analysis (100 replicates) using the Neighbor-Joining distance method. d) Conservation of synteny between zebrafish *wnt16* (top), human *WNT16* (middle), and mouse *Wnt16* (bottom). Schematic of relevant chromosomal regions with dashed lines linking homologous genes. Zebrafish *si:ch211-152m4.1*, human *C7orf58*, and mouse *A430107O13Rik* are homologous genes with different Ensembl annotations.

Figure S2

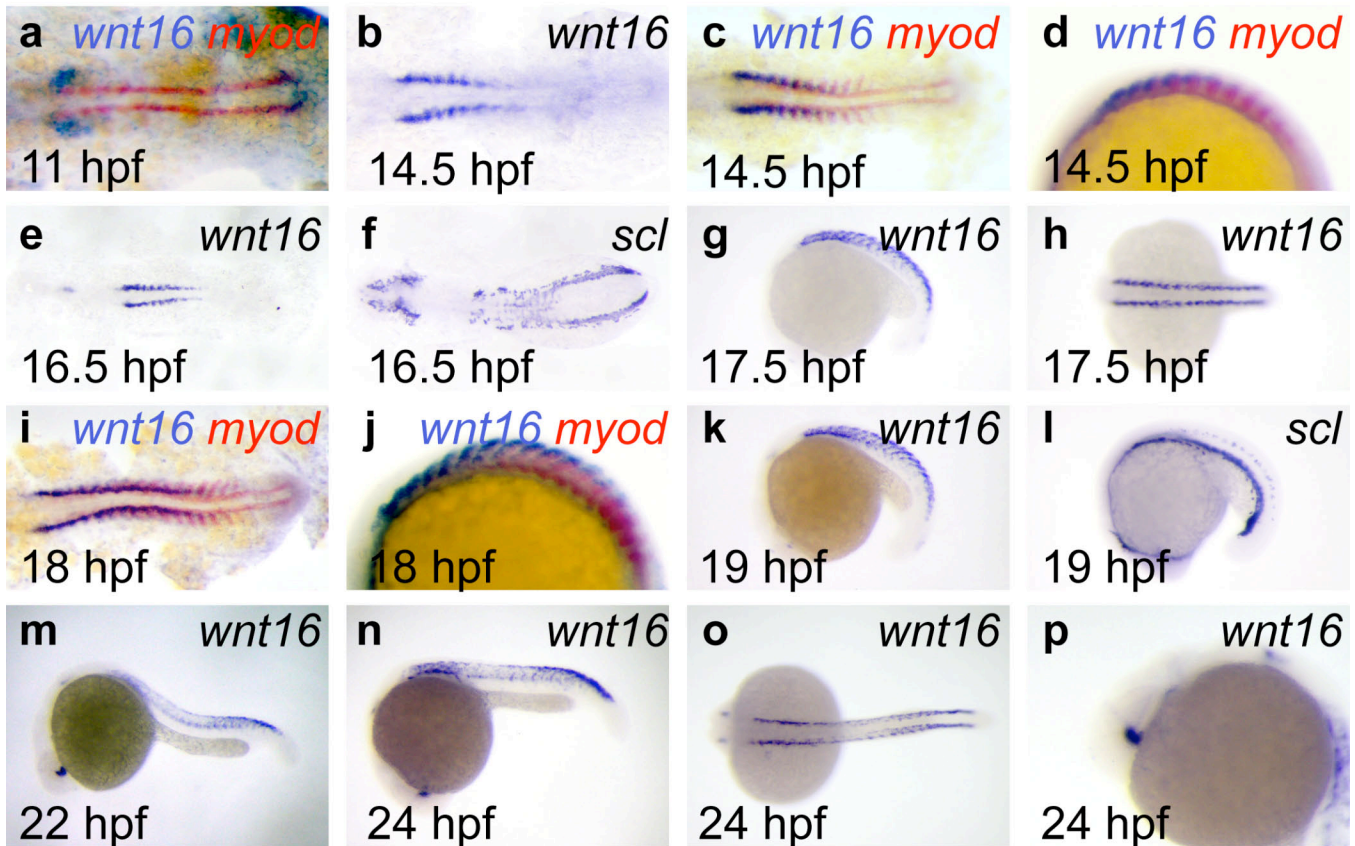

**Supplementary Figure 2. Expression of zebrafish *wnt16*.** Expression of *wnt16* by WISH at the embryonic stages indicated (a-e, g-k, m-p), with, in some cases, secondary processing for *myod* (red; a, c, d, i, j) to identify the location of the posterior somite compartment, and individual panels of the vascular/haematopoietic marker *scl* (f, l) for comparison. Flat mount (a-c, e-f, i), close up lateral trunk (d, j) or head (p), lateral (g, k-n), and dorsal (h, o) views are shown with anterior to the left.

Figure S3

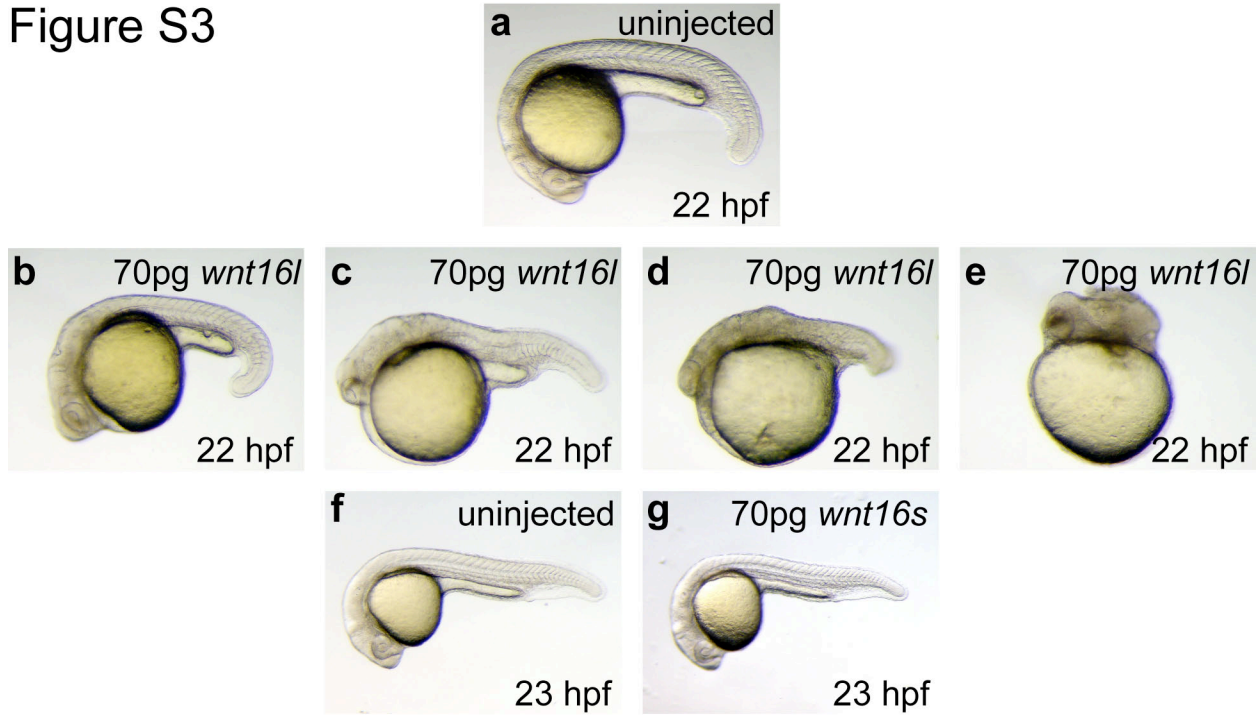

**Supplementary Figure 3. Phenotypes caused by injection of *wnt16* mRNA.** A representative uninjected embryo (a) at 22 hpf (26-ss) compared to sibling embryos displaying a range of phenotypes (b-e) caused by injection of 70 pg *wnt16l* isoform mRNA. A representative uninjected embryo at 23 hpf (f) compared to a representative embryo injected with 70 pg *wnt16s* isoform mRNA (g).

Figure S4

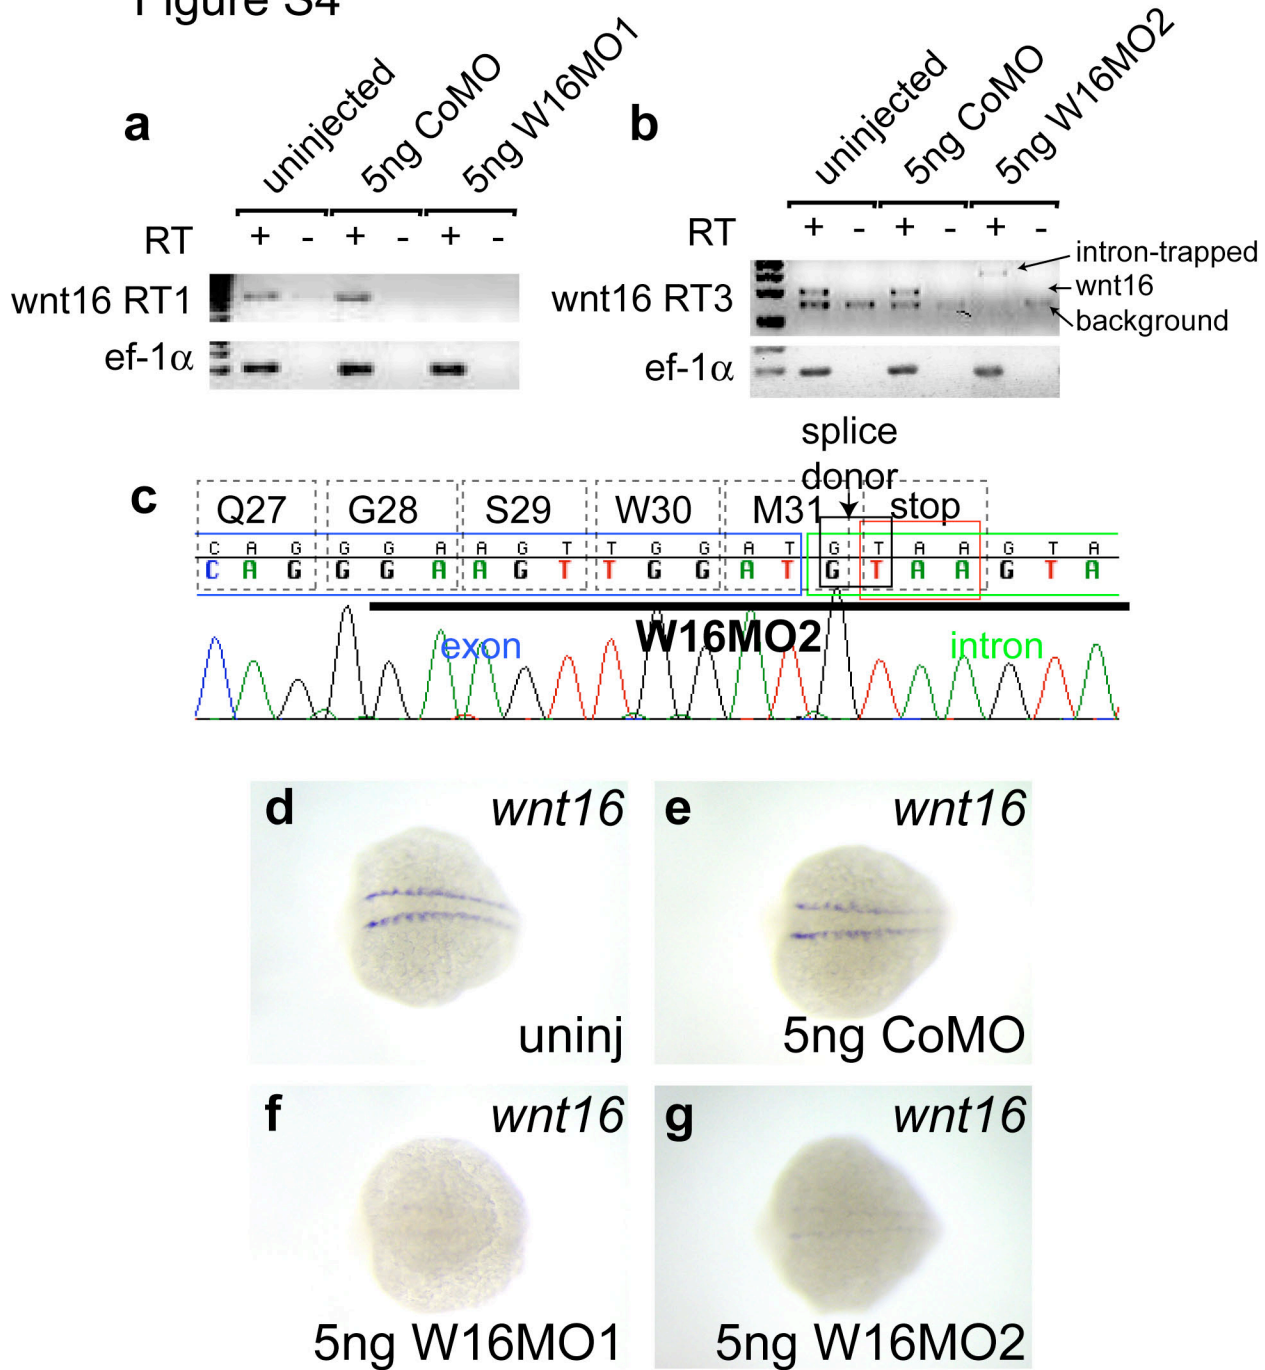

**Supplementary Figure 4. Effectiveness of *wnt16* morpholinos.** cDNA from embryos injected with W16MO1 (a) or W16MO2 (b) was subjected to RT-PCR analysis using RT1 (a) or RT3 (b) primers depicted in Fig. S1, and *ef-1α* as a control. For W16MO1 no higher molecular weight products were observed, indicating that message was degraded by nonsense-mediated decay. The intron-trapped product (indicated, b) produced by W16MO2 injection, was verified by sequencing and leads to message with an introduced stop codon after amino acid 31 (c). WISH demonstrates that the *wnt16* transcript recognized by the wild-type probe is present at normal levels in uninjected embryos (278/278; d) and embryos injected with a control 5-base-mismatch morpholino (124/124; e), but not embryos injected with W16MO1 (181/215; f) or W16MO2 (130/147; g). d-g, 17 hpf (16-ss) embryos, dorsal views, with anterior to the left.



Figure S5

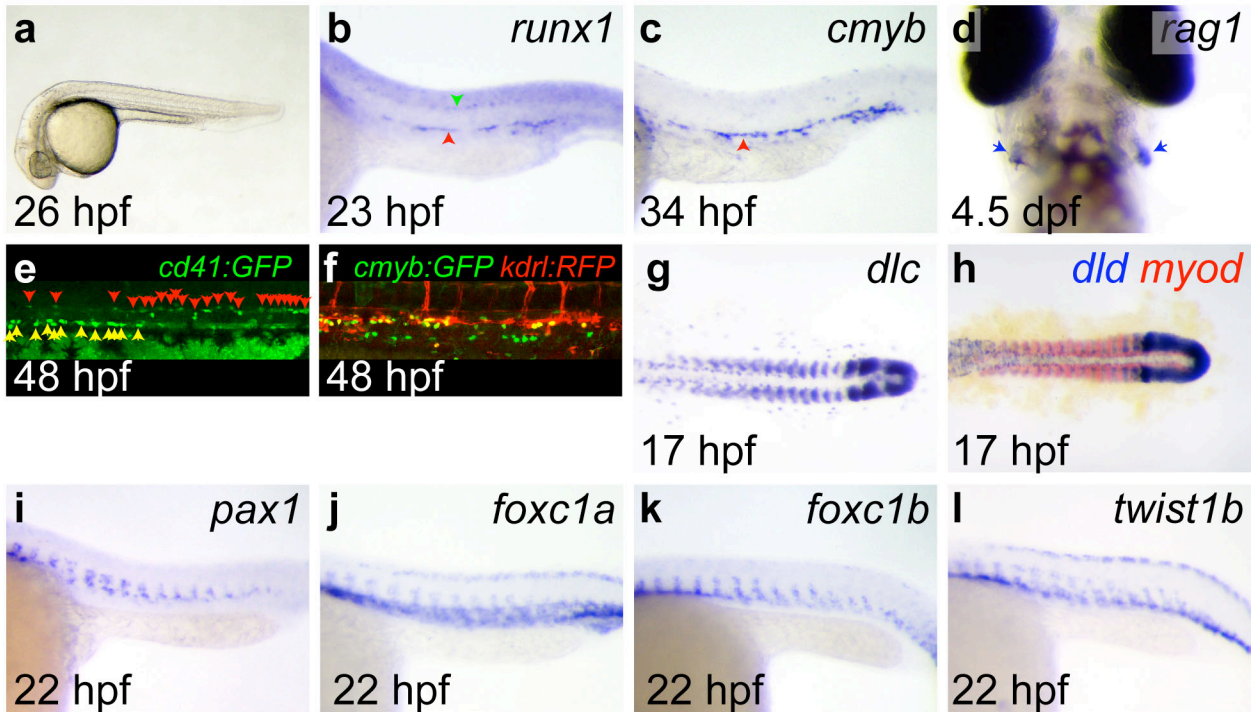

**Supplementary Figure 5. Wnt16 control morpholino effects.** Embryos injected with 5ng of a control morpholino with 5 bp mismatches compared to W16MO1 have unaffected Wnt16-regulated gene expression. Brightfield (a), *runx1* (b), *cmyb* (c), *rag1* (d), *cd41:GFP* (e), *cmyb:GFP;kdrl:RFP* (f), *dlc* (g), *dld/myod* (h), *pax1* (i), *foxc1a* (j), *foxc1b* (k), *twist1b* (l). Red arrowheads mark dorsal aorta (b, c), or HSCs (e). Green arrowhead marks neural expression (b). Yellow arrows mark pronephric multiciliate cells (e). Blue arrows mark thymi (d). a, lateral; b, c, e, f, i-l close up lateral of trunk/aorta region; d, ventral; and g, h, flat mount. a-c, e-l anterior left; d, anterior up.

Figure S6

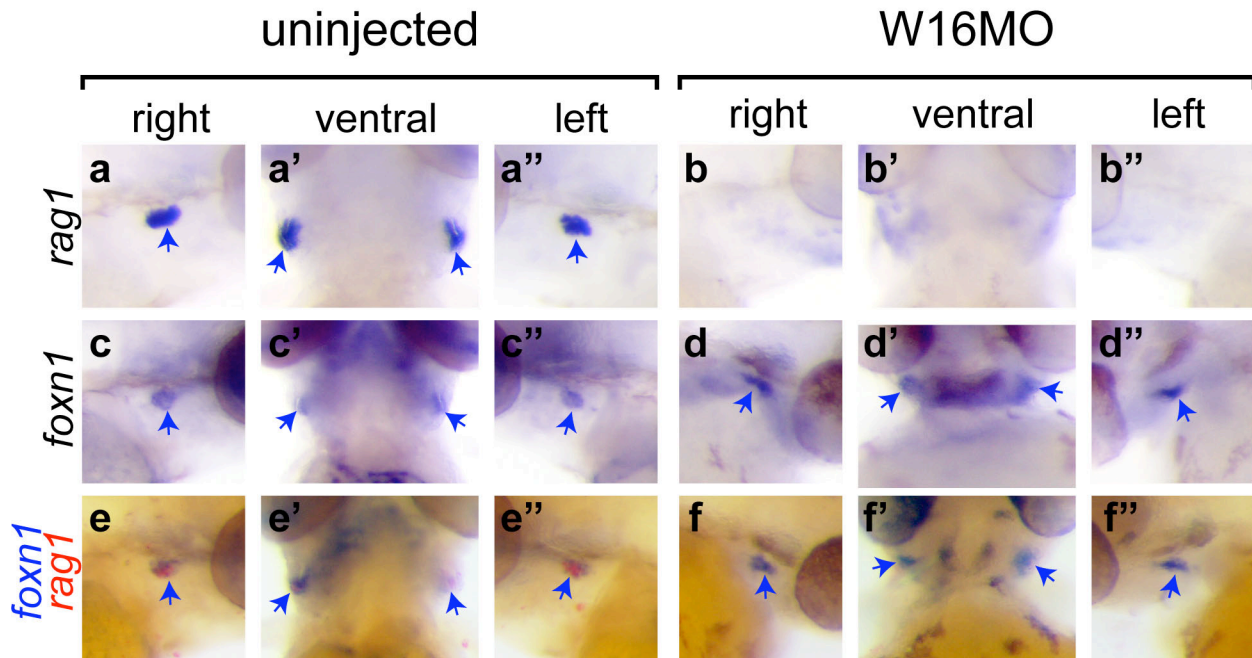

**Supplementary Figure 6. Thymic epithelium is intact in W16MO animals.** Expression of the lymphocyte marker *rag1* (a-b''), the thymic epithelium marker *foxn1* (c-d''), or both (e-f'') in uninjected (left panels) or W16MO-injected animals (right panels) as indicated. Right (a-f) and left (a''-f'') lateral views and ventral (a'-f') views are shown. Blue arrowheads indicate T-cells (a-a'', e-f'') and/or thymi (c-f'').

Figure S7

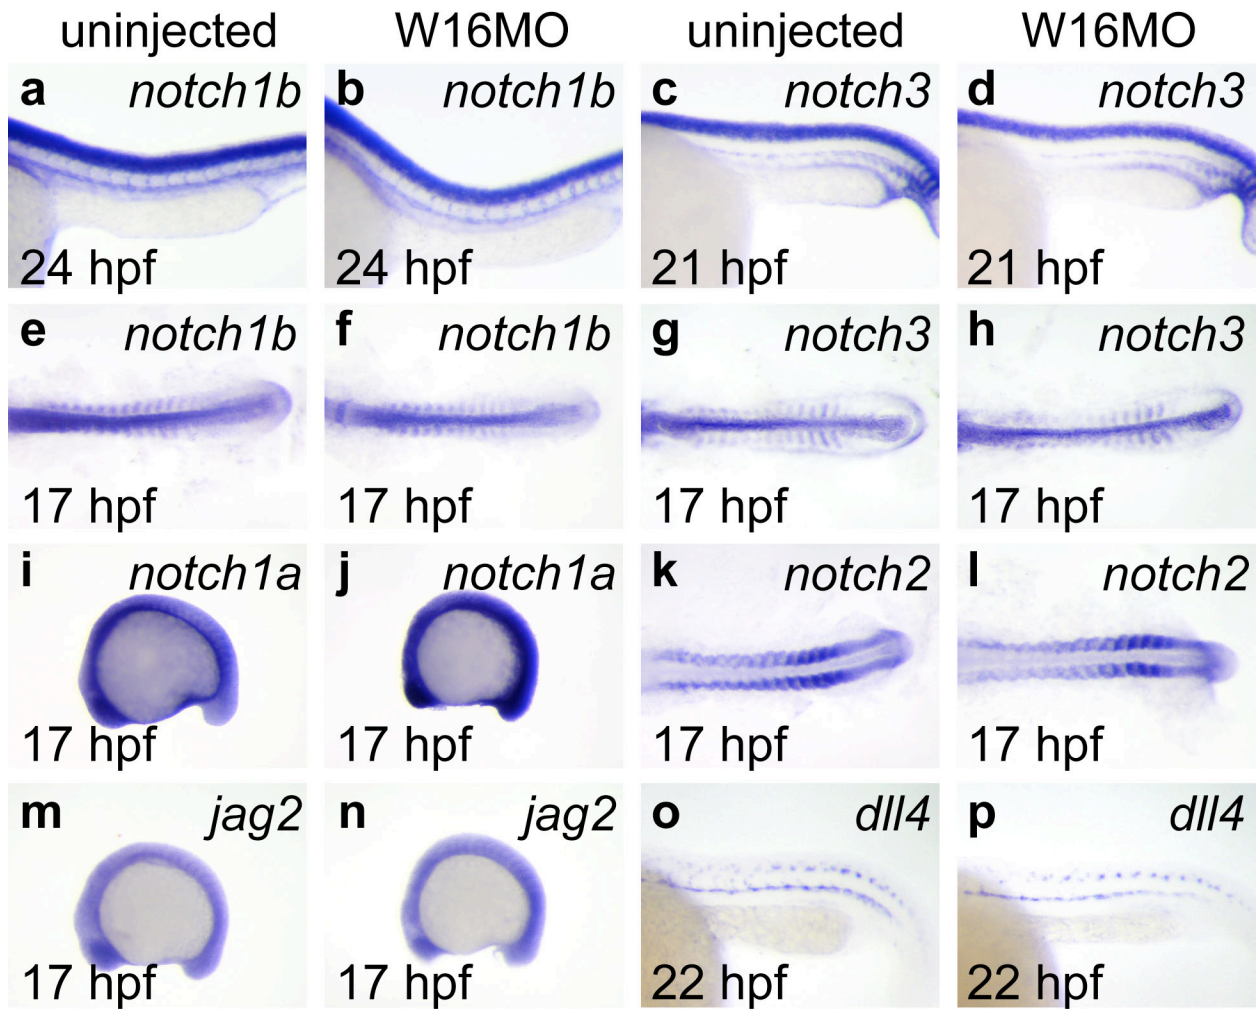

**Supplementary Figure 7. Selected Notch ligands and receptors unaffected by reduction of Wnt16 activity.** Comparison of the expression of *notch1b* (a-b, e-f), *notch3* (c-d, g-h), *notch1a* (i-j), *notch2* (k-l), *jag2* (m-n) and *dll4* (o-p) at the times indicated, in uninjected or W16MO-injected embryos, as indicated above each column. a-d, i-j, m-p, lateral views. g-h, k-l flat mounts. All anterior to the left.

Figure S8

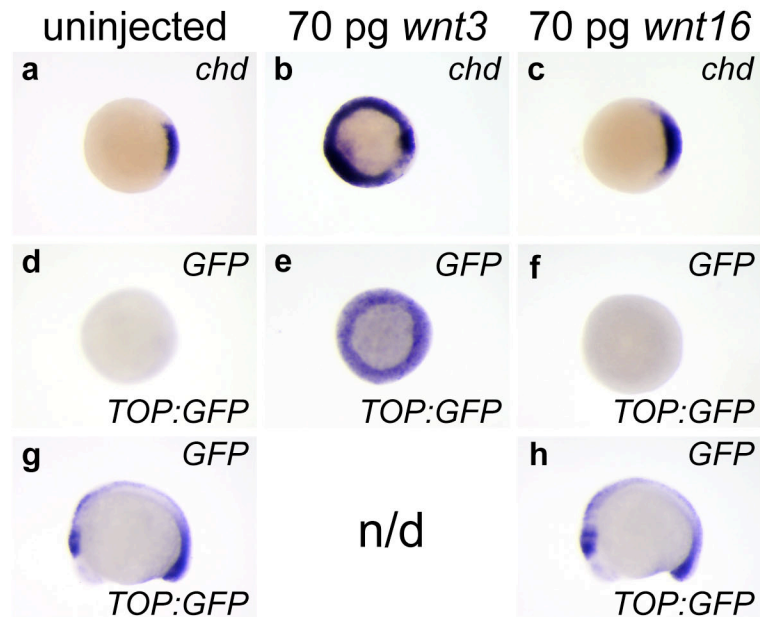

**Supplementary Figure 8. Wnt16 is non-canonical.** 6 hpf (shield stage; top two rows) or 17 hpf (16-ss; bottom row) embryos. Uninjected (left column), injected with 70 pg *wnt3* mRNA (center column), or 70 pg *wnt16* mRNA (right column) embryos, processed by WISH for the canonical target gene *chd* (top row), or *GFP* in *Tg(TOP:GFP)<sup>w25</sup>* Wnt/ $\beta$ -catenin/Tcf-reporter animals (bottom two rows). a-f, animal views, dorsal to the right, where known. g-h, anterior left, dorsal up.

Figure S9

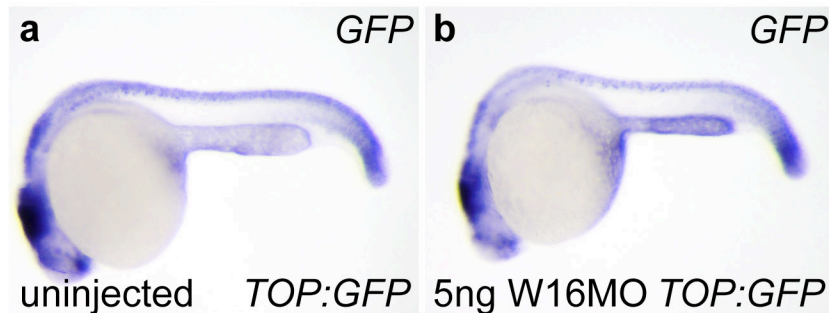

**Supplementary Figure 9. Decreased Wnt16 activity does not alter  $\beta$ -catenin/Tcf-dependent Wnt pathway activity.** Uninjected (a) or W16MO-injected (b) *Tg(TOP:GFP)<sup>w25</sup>* animals processed by WISH for *GFP* show no difference in tissue-specific levels of  $\beta$ -catenin/Tcf-dependent Wnt signalling at 22 hpf.



Figure S10

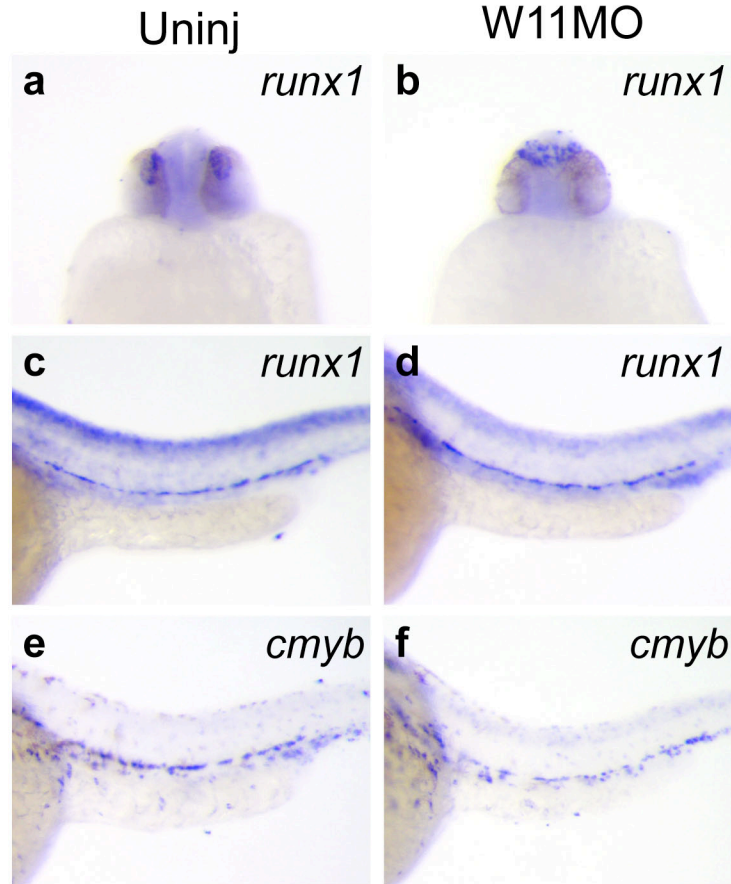

**Supplementary Figure 10. Wnt11 knock down does not affect HSCs.** Wild-type (a) or cyclopic phenotype (b) confirms Wnt11 knockdown. Embryos processed for the HSC markers *runx1* at 24 hpf (c-d) or *cmyb* at 36 hpf (e-f). Uninjected (left column) or W11MO-injected (right column). a-b, ventral head views. c-f close up lateral trunk views, anterior left.

Figure S11

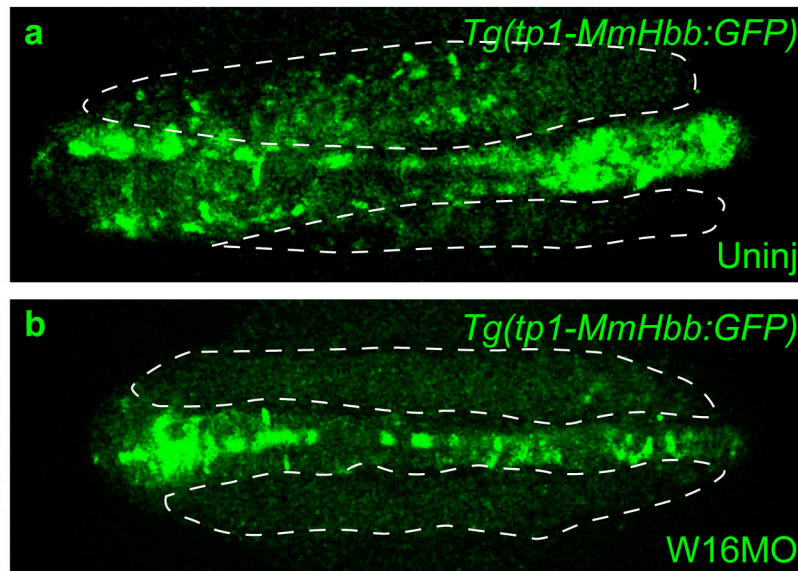

**Supplementary Figure 11. Decreased expression of a Notch reporter fluorophore in W16MO somites.** GFP fluorescence in the somites (outlined with dashed white lines) and axial tissue of a transgenic animal carrying *gfp* under the control of a Notch-responsive promoter was examined by max-projection confocal imaging at 17.5 hpf in uninjected (a) or W16MO-injected (b) animals. Dorsal views, anterior left.

Figure S12

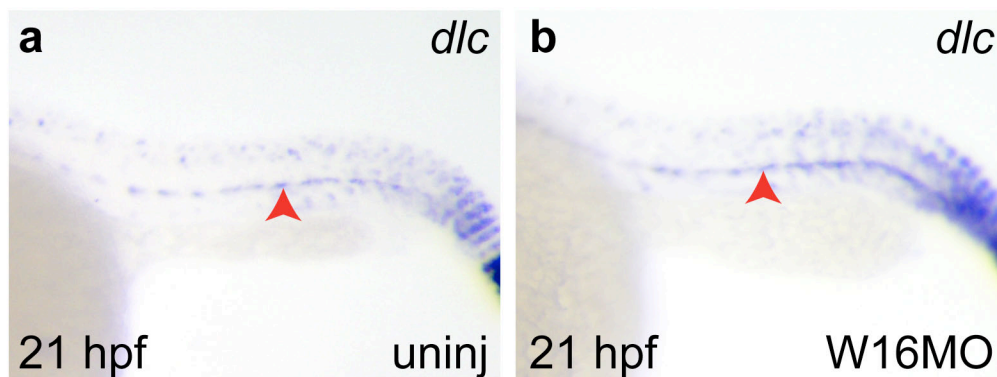

**Supplementary Figure 12. Dorsal aorta expression of *dlc* in *wnt16* morphants.** Comparative expression of *dlc* in the dorsal aorta (red arrowhead) of uninjected (a) or W16MO-injected (b) embryos at 21 hpf (24-ss). Close up lateral views, anterior to the left.

Figure S13

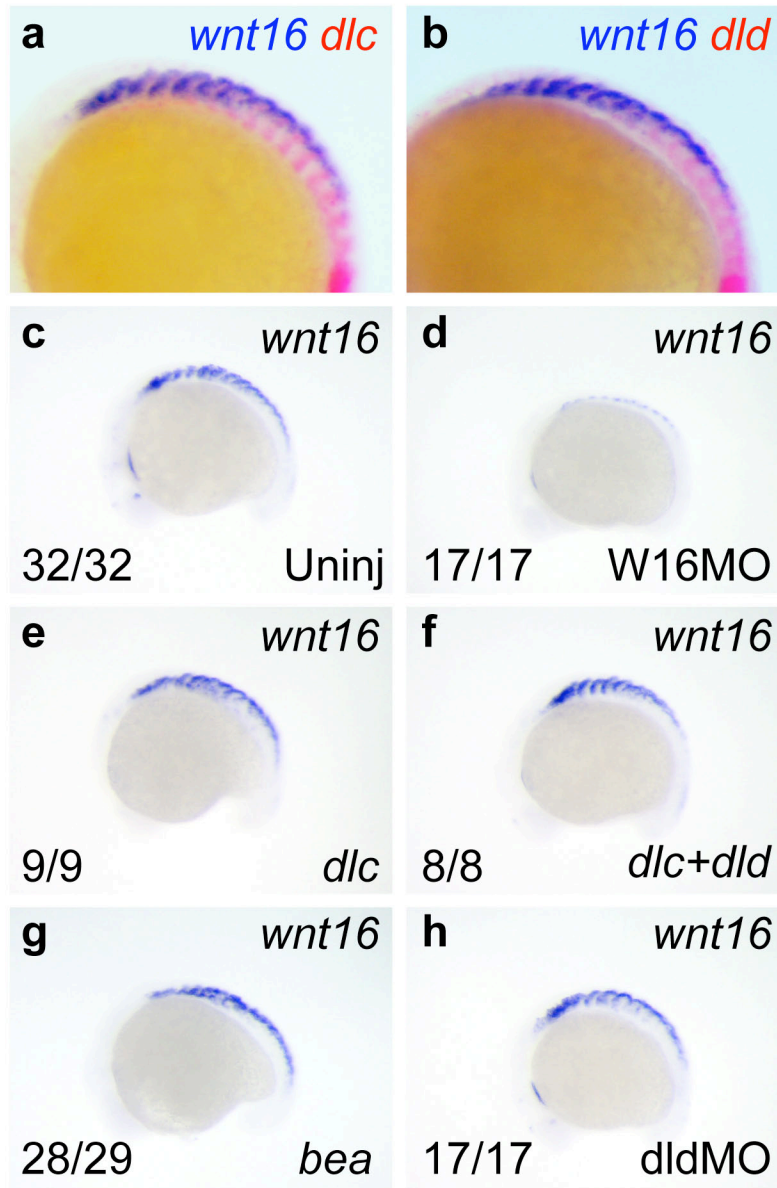

**Supplementary Figure 13. Dlc/Dld do not regulate *wnt16*.** Expression of *wnt16* at 17 hpf (16-ss) was compared to that of *dlc* (a) or *dld* (b) to examine overlap. Both overlapping and non-overlapping expression is observed. *Wnt16* expression in uninjected (c), W16MO-injected (d), *dlc* mRNA-injected (e), *dlc+dld* mRNA-injected (f), *bea* homozygous mutants (g), and *dld*MO-injected animals (h). Only W16MO causes an alteration in *wnt16*. All lateral views, anterior left.

Figure S14

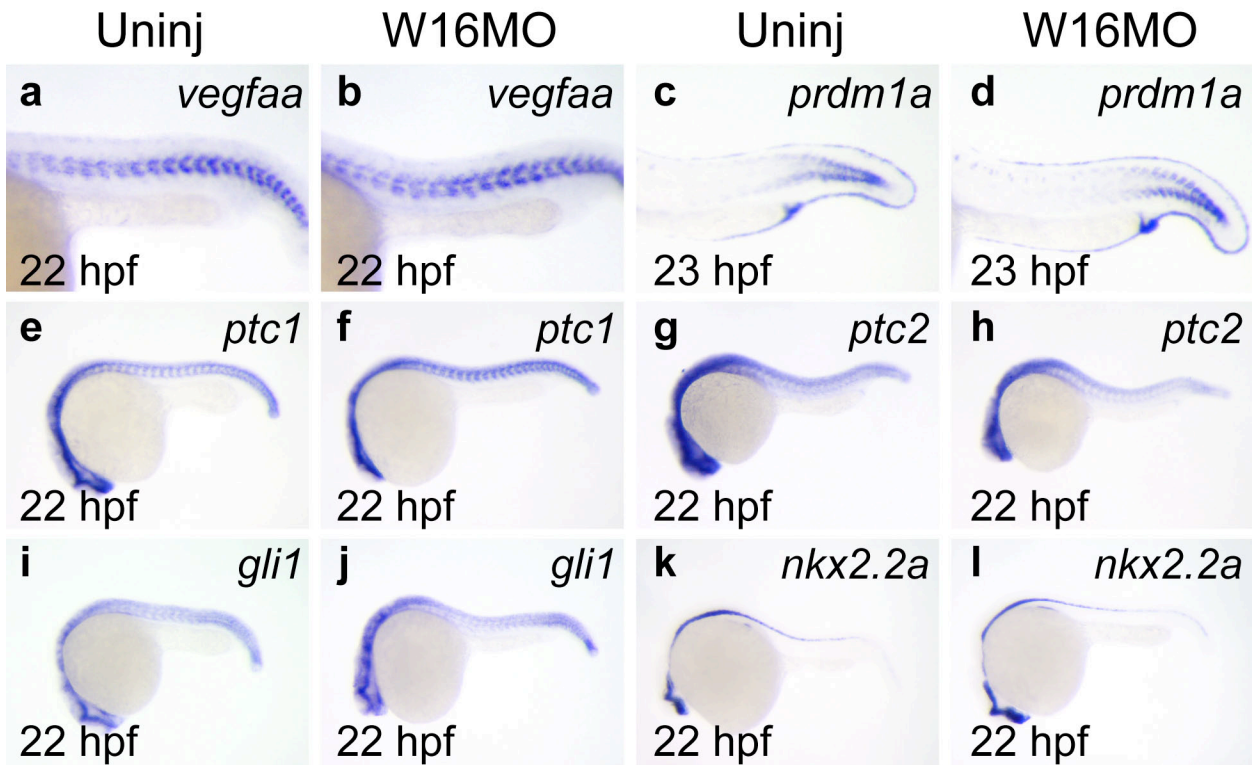

**Supplementary Figure 14. Expression of Shh target genes in *wnt16* morphants.** Expression of the indicated Shh target genes was examined in uninjected or W16MO-injected animals as indicated above each column, at the time points noted. No significant alteration was observed. a-d close up lateral views. e-l lateral views. All anterior to the left.



Figure S15

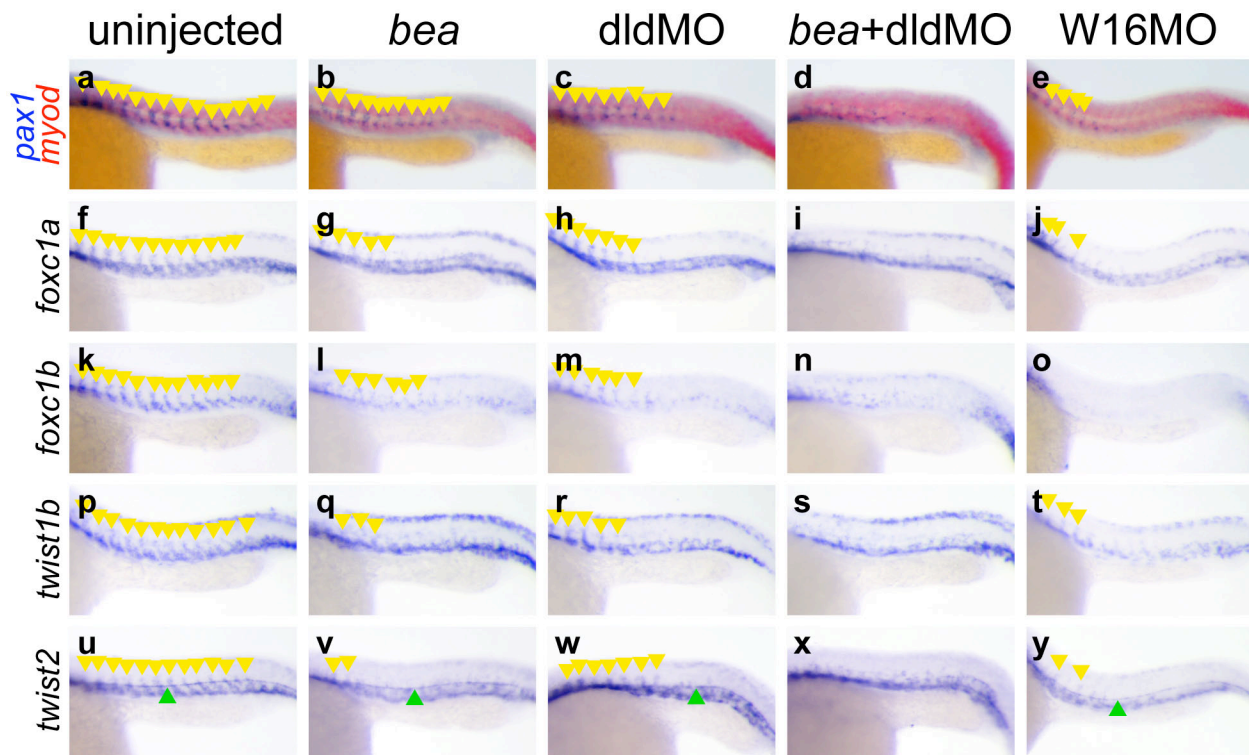

**Supplementary Figure 15. Wnt16 and Dlc/Dld are required for sclerotome patterning.** Expression of the sclerotomal markers *pax1* (a-e), *foxc1a* (f-j), *foxc1b* (k-o), *twist1b* (p-t), and *twist2* (u-y), with *myod* (a-d) shown for reference in red. Uninjected, homozygous *bea*, wild-type injected with *dldMO*, homozygous *bea* injected with *dldMO*, or W16MO embryos are shown as indicated above each column. Yellow arrowheads identify a dorsomedial somitic sclerotomal domain, when present. Green arrowheads identify the hypochord, when present (u-y). Close up lateral views of the trunk region, anterior left, dorsal up.

**Supplementary Movie 1. HSCs in uninjected *cd41:GFP* transgenic animals.** Timelapse imaging of the trunk region, where GFP<sup>+</sup> HSCs first appear near the dorsal aorta, in *cd41:GFP* transgenic animals visualized from approximately 50 hpf to approximately 75 hpf, at one frame every 3 mins. In the reference frames, red arrows indicate HSCs, and yellow arrows indicate multiciliate cells in the pronephros. Bright, rapidly circulating cells that begin appearing at about ~5 secs. (~53 hpf) are thrombocytes. Labelled reference frames have been added at 0 secs. (~50 hpf), 14 secs. (~60 hpf) and at 37 secs. (~75 hpf). Images were captured in parallel to the images presented in Movies S2-S4. Anterior to the left and dorsal up.

**Supplementary Movie 2. HSCs are greatly reduced in W16MO-injected *cd41:GFP* transgenic animals.** Timelapse images of W16MO-injected embryos, captured in parallel to the images presented in Movies S1, S3-S4, reveal vastly fewer HSCs, but normal multiciliate cells of the pronephros. Labelled as for Movie S1. Anterior to the left and dorsal up.

**Supplementary Movie 3. Thymic immigration of lymphocyte precursors in *cd41:GFP* animals.** Timelapse images of the head region of uninjected *cd41:GFP* transgenic animals captured in parallel to the images presented in Movies S1-S2, S4. The prospective thymus (50 hpf), thymic rudiment (60 hpf), and thymus (75 hpf) are identified with blue arrows in reference frames added at 0 secs., 14 secs., and 37 secs., respectively. Lymphocyte precursors retain the GFP label allowing visualization of their immigration. Anterior to the left and dorsal up.

**Supplementary Movie 4. Greatly reduced thymic immigration of lymphocyte precursors in W16MO-injected *cd41:GFP* transgenic animals.** Timelapse images of W16MO-injected embryos, captured in parallel to the images presented in Movies S1-S3, reveal vastly fewer lymphocyte precursors immigrating to the thymus. Labelled as for Movie S3. Anterior to the left and dorsal up.

**Table S1. *Wnt16* mRNA overexpression effects.**

| Morphology         | wild-type | dorsalized | A/P Defects <sup>1</sup> | Other  |
|--------------------|-----------|------------|--------------------------|--------|
| uninjected         | 232/235   | 0/235      | 0/235                    | 3/235  |
| 70pg <i>wnt16s</i> | 34/34     | 0/34       | 0/34                     | 0/34   |
| 70pg <i>wnt16l</i> | 28/199    | 18/199     | 140/199                  | 13/199 |

| <i>chd</i> at shield | wild-type | weak ectopic | strong ectopic |
|----------------------|-----------|--------------|----------------|
| uninjected           | 81/81     | 0/81         | 0/81           |
| 70pg <i>wnt3</i>     | 0/38      | 4/38         | 34/38          |
| 70pg <i>wnt16l</i>   | 41/67     | 26/67        | 0/67           |
| <i>gfp</i> at shield |           |              |                |
| uninjected           | 34/34     | 0/34         | 0/34           |
| 70pg <i>wnt3</i>     | 0/20      | 0/20         | 20/20          |
| 70pg <i>wnt16l</i>   | 16/16     | 0/16         | 0/16           |
| <i>gfp</i> at 16-s.  |           |              |                |
| uninjected           | 14/14     | 0/14         | 0/14           |
| 70pg <i>wnt16l</i>   | 18/18     | 0/18         | 0/18           |

<sup>1</sup>"A/P Defects" comprise anterior/posterior extension defects.

**Table S2. W16MO effects on HSC-associated genes.**

| HSC Genes                 |           |           |        |         |
|---------------------------|-----------|-----------|--------|---------|
|                           | treatment | wild-type | weak   | strong  |
| <i>runx1</i> <sup>1</sup> | Uninj     | 202/251   | 49/251 | 0/251   |
|                           | 5ng CoMO  | 8/13      | 5/13   | 0/13    |
|                           | 5ng W16MO | 39/249    | 16/249 | 194/249 |
| <i>cmyb</i> <sup>1</sup>  | Uninj     | 96/109    | 13/109 | 0/109   |
|                           | 5ng CoMO  | 27/34     | 7/34   | 0/34    |
|                           | 5ng W16MO | 27/116    | 26/116 | 63/116  |
| <i>cd41:GFP</i>           | Uninj     | 98/98     | 0/98   | 0/98    |
|                           | 5ng CoMO  | 121/125   | 4/125  | 0/125   |
|                           | 5ng W16MO | 52/145    | 9/145  | 84/145  |
| <i>rag1</i> <sup>3</sup>  | Uninj     | 39/40     | 1/40   | 0/40    |
|                           | 5ng CoMO  | 12/12     | 0/12   | 0/12    |
|                           | 5ng W16MO | 2/58      | 15/58  | 41/58   |

<sup>1</sup>"Wild-type" denotes abundant positive cells in the aortic region. "Weak" denotes intermediate decrease. "Strong" denotes very few or no positive cells. <sup>2</sup>"Wild-type" denotes abundant small round cells between the dorsal aorta and posterior cardinal vein. "Weak" denotes intermediate decrease. "Strong" denotes very few, or no positive cells. <sup>3</sup>"Wild-type" denotes strong bilateral thymic *rag1*<sup>+</sup> cells. "Weak" denotes decreased or one-sided *rag1*<sup>+</sup> cells. "Strong" denotes almost no, or no *rag1*<sup>+</sup> cells.

**Table S3. W16MO effects on control genes.**

| Unaffected Genes |           |           |       |        |
|------------------|-----------|-----------|-------|--------|
|                  | treatment | wild-type | weak  | strong |
| <i>gata1</i>     | Uninj     | 33/36     | 3/36  | 0/36   |
|                  | 5ng W16MO | 49/49     | 0/49  | 0/49   |
| <i>myod</i>      | Uninj     | 29/29     | 0/29  | 0/29   |
|                  | 5ng W16MO | 38/42     | 4/42  | 0/42   |
| <i>tll1</i>      | Uninj     | 49/49     | 0/49  | 0/49   |
|                  | 5ng W16MO | 37/55     | 12/55 | 6/55   |
| <i>cdh5</i>      | Uninj     | 32/32     | 0/32  | 0/32   |
|                  | 5ng W16MO | 17/17     | 0/17  | 0/17   |
| <i>flk1</i>      | Uninj     | 34/34     | 0/34  | 0/34   |
|                  | 5ng W16MO | 31/31     | 0/31  | 0/31   |
| <i>efnb2a</i>    | Uninj     | 53/53     | 0/53  | 0/53   |
|                  | 5ng W16MO | 55/55     | 0/55  | 0/55   |
| <i>col2a1a</i>   | Uninj     | 85/90     | 5/90  | 0/90   |
|                  | 5ng W16MO | 72/79     | 7/79  | 0/79   |
| <i>cdh17</i>     | Uninj     | 30/30     | 0/30  | 0/30   |
|                  | 5ng W16MO | 45/45     | 0/45  | 0/45   |
| <i>foxn1</i>     | Uninj     | 14/14     | 0/14  | 0/14   |
|                  | 5ng W16MO | 0/9       | 0/9   | 0/9    |
| <i>shha</i>      | Uninj     | 20/20     | 0/20  | 0/20   |
|                  | 5ng W16MO | 20/20     | 0/20  | 0/20   |
| <i>gfp</i>       | Uninj     | 102/102   | 0/102 | 0/102  |
|                  | 5ng CoMO  | 26/26     | 0/26  | 0/26   |
|                  | 5ng W16MO | 73/73     | 0/73  | 0/73   |

<sup>1</sup>Some effects in this group may reflect heterochronicity. <sup>2</sup>WISH processing for *GFP* transcripts in *TOP:GFP* transgenic animals.

**Table S4. W11MO effects on HSC genes.**

| Wnt11 Morpholino Phenotypes |           |           |             |               |
|-----------------------------|-----------|-----------|-------------|---------------|
|                             | treatment | wild-type | weak effect | strong effect |
| <i>runx1</i>                | Uninj     | 19/20     | 1/20        | 0/20          |
|                             | W11MO     | 25/29     | 4/29        | 0/29          |
| <i>cmyb</i>                 | Uninj     | 20/20     | 0/20        | 0/20          |
|                             | W11MO     | 9/16      | 7/16        | 0/16          |
| cyclopia                    | Uninj     | 40/40     | 0/40        | 0/40          |
|                             | W11MO     | 0/45      | 0/45        | 45/45         |



**Table S5. W16MO and CoMO effects on Notch pathway genes.**

| Notch Pathway Genes   |           |           |        |        |
|-----------------------|-----------|-----------|--------|--------|
|                       | treatment | wild-type | weak   | strong |
| <i>dlc</i> (16-18hpf) | Uninj     | 51/51     | 0/51   | 0/51   |
|                       | 5ng CoMO  | 24/27     | 3/27   | 0/27   |
|                       | 5ng W16MO | 0/63      | 7/63   | 56/63  |
| <i>dlc</i> (22-25hpf) | Uninj     | 113/114   | 1/114  | 0/114  |
|                       | 5ng CoMO  | 64/67     | 3/67   | 0/67   |
|                       | 5ng W16MO | 134/174   | 30/174 | 10/174 |
| <i>dld</i> (16-18hpf) | Uninj     | 76/76     | 0/76   | 0/76   |
|                       | 5ng CoMO  | 52/73     | 21/73  | 0/73   |
|                       | 5ng W16MO | 20/120    | 47/120 | 53/120 |
| <i>dll4</i>           | Uninj     | 93/96     | 3/96   | 0/96   |
|                       | 5ng CoMO  | 30/36     | 6/36   | 0/36   |
|                       | 5ng W16MO | 19/81     | 56/81  | 6/81   |
| <i>jag1b</i>          | Uninj     | 44/44     | 0/44   | 0/44   |
|                       | 5ng CoMO  | 35/35     | 0/35   | 0/35   |
|                       | 5ng W16MO | 69/69     | 0/69   | 0/69   |
| <i>jag2</i>           | Uninj     | 28/28     | 0/28   | 0/28   |
|                       | 5ng CoMO  | 17/17     | 0/17   | 0/17   |
|                       | 5ng W16MO | 35/35     | 0/35   | 0/35   |
| <i>notch1a</i>        | Uninj     | 28/28     | 0/28   | 0/28   |
|                       | 5ng CoMO  | 18/18     | 0/18   | 0/18   |
|                       | 5ng W16MO | 34/34     | 0/34   | 0/34   |
| <i>notch1b</i>        | Uninj     | 145/145   | 0/145  | 0/145  |
|                       | 5ng CoMO  | 79/80     | 1/80   | 0/80   |
|                       | 5ng W16MO | 134/191   | 41/191 | 19/191 |
| <i>notch2</i>         | Uninj     | 41/41     | 0/41   | 0/41   |
|                       | 5ng CoMO  | 17/17     | 0/17   | 0/17   |
|                       | 5ng W16MO | 29/29     | 0/29   | 0/29   |
| <i>notch3</i>         | Uninj     | 150/154   | 4/154  | 0/154  |
|                       | 5ng CoMO  | 65/69     | 4/69   | 0/69   |
|                       | 5ng W16MO | 155/207   | 39/207 | 13/207 |

**Table S6. Notch path perturbation effects on HSC-associated genes.**

| HSC Genes    |                    |           |        |        |
|--------------|--------------------|-----------|--------|--------|
|              |                    | wild-type | weak   | strong |
| <i>runx1</i> | uninj              | 99/111    | 12/111 | 0/111  |
|              | <i>bea</i>         | 12/68     | 44/68  | 12/68  |
|              | dldMO2             | 0/22      | 12/22  | 10/22  |
|              | <i>bea</i> +dldMO2 | 0/31      | 0/31   | 31/31  |
| <i>cmyb</i>  | uninj              | 62/67     | 5/67   | 0/67   |
|              | <i>bea</i>         | 11/60     | 32/60  | 16/60  |
|              | dldMO2             | 0/12      | 5/12   | 7/12   |
|              | <i>bea</i> +dldMO2 | 0/18      | 0/18   | 18/18  |
| <i>rag1</i>  | uninj              | 41/41     | 0/41   | 0/41   |
|              | <i>bea</i>         | 28/35     | 7/35   | 0/35   |
|              | dldMO2             | 27/28     | 1/28   | 0/28   |
|              | <i>bea</i> +dldMO2 | 0/9       | 0/9    | 9/9    |

**Table S7. W16MO effects on Shh pathway genes.**

| Shh Target Genes |           |           |       |        |
|------------------|-----------|-----------|-------|--------|
|                  | treatment | wild-type | weak  | strong |
| <i>vegfaa</i>    | Uninj     | 32/32     | 0/32  | 0/32   |
|                  | 5ng W16MO | 42/53     | 11/53 | 0/53   |
| <i>prdm1a</i>    | Uninj     | 74/74     | 0/74  | 0/74   |
|                  | 5ng W16MO | 56/56     | 0/56  | 0/56   |
| <i>ptc1</i>      | Uninj     | 62/62     | 0/62  | 0/62   |
|                  | 5ng W16MO | 53/57     | 4/57  | 0/57   |
| <i>ptc2</i>      | Uninj     | 33/33     | 0/33  | 0/33   |
|                  | 5ng W16MO | 36/36     | 0/36  | 0/36   |
| <i>gli1</i>      | Uninj     | 33/33     | 0/33  | 0/33   |
|                  | 5ng W16MO | 44/44     | 0/44  | 0/44   |
| <i>nkx2.2a</i>   | Uninj     | 39/39     | 0/39  | 0/39   |
|                  | 5ng W16MO | 50/50     | 0/50  | 0/50   |

**Table S8. Notch rescue of W16MO HSC phenotype.**

|                    | wild-type | decreased | increased |
|--------------------|-----------|-----------|-----------|
| uninj              | 27/33     | 6/33      | 0/33      |
| uninj NICD+        | 2/11      | 0/11      | 9/11      |
| W16MO NICD- 14h hs | 9/73      | 63/73     | 2/73      |
| W16MO NICD+ 14h hs | 3/13      | 1/13      | 9/13      |
| W16MO NICD- 16h hs | 7/33      | 26/33     | 0/33      |
| W16MO NICD+ 16h hs | 4/14      | 10/14     | 0/14      |

**Table S9. Loss of sclerotome in W16MO and Dlc/Dld Knock down.**

| Sclerotome Genes |                   |           |        |         |
|------------------|-------------------|-----------|--------|---------|
|                  | treatment         | wild-type | weak   | strong  |
| <i>pax1</i>      | Uninj             | 160/165   | 3/165  | 2/165   |
|                  | 5ng CoMO          | 27/27     | 0/27   | 0/27    |
|                  | 5ng W16MO         | 4/155     | 39/155 | 117/155 |
|                  | <i>bea</i>        | 13/67     | 50/67  | 4/57    |
|                  | 7ng dldMO         | 5/48      | 43/48  | 0/48    |
|                  | <i>bea</i> +dldMO | 0/52      | 10/52  | 42/52   |
| <i>foxc1a</i>    | Uninj             | 127/127   | 0/127  | 0/127   |
|                  | 5ng CoMO          | 14/14     | 0/14   | 0/14    |
|                  | 5ng W16MO         | 0/73      | 0/73   | 73/73   |
|                  | <i>bea</i>        | 0/68      | 68/68  | 0/68    |
|                  | 7ng dldMO         | 13/68     | 53/68  | 2/68    |
|                  | <i>bea</i> +dldMO | 0/52      | 0/52   | 52/52   |
| <i>foxc1b</i>    | Uninj             | 92/92     | 2/94   | 0/94    |
|                  | 5ng CoMO          | 18/18     | 0/18   | 0/18    |
|                  | 5ng W16MO         | 0/91      | 0/91   | 91/91   |
|                  | <i>bea</i>        | 0/32      | 32/32  | 0/32    |
|                  | 7ng dldMO         | 6/39      | 33/39  | 0/39    |
|                  | <i>bea</i> +dldMO | 0/34      | 2/34   | 32/34   |
| <i>twist1b</i>   | Uninj             | 55/55     | 0/55   | 0/55    |
|                  | 5ng CoMO          | 19/19     | 0/19   | 0/19    |
|                  | 5ng W16MO         | 0/41      | 8/41   | 33/41   |
|                  | <i>bea</i>        | 0/16      | 16/16  | 0/16    |
|                  | 7ng dldMO         | 6/14      | 8/14   | 0/14    |
|                  | <i>bea</i> +dldMO | 0/37      | 0/37   | 37/37   |
| <i>twist2</i>    | Uninj             | 24/24     | 0/24   | 0/24    |
|                  | 5ng W16MO         | 0/23      | 5/23   | 18/23   |
|                  | <i>bea</i>        | 0/18      | 0/18   | 18/18   |
|                  | 7ng dldMO         | 3/22      | 5/22   | 14/22   |
|                  | <i>bea</i> +dldMO | 0/17      | 0/17   | 17/17   |
