# Supplementary material
Source: PubMed Central journal article supplement (PMC3304471)
Supplement: NIHMS313009-supplement-supplement_1.pdf [file NIHMS313009-supplement-supplement_1.pdf]

## Methods.

**Zebrafish husbandry, microinjections and heat shock.** Zebrafish strains AB\*, *Tg(TOP:GFP)<sup>w25</sup>*, *Tg(-6.0itga2b:eGFP)<sup>la2</sup>*, *Tg(hsp70l:Gal4)<sup>1.5kca4</sup>*, *Tg(UAS:myc-Notch1a-intra)<sup>kca3</sup>*, *Tg(tp1-MmHbb:EGFP)<sup>um14</sup>*, *Tg(tp1-MmHbb:Kaede)<sup>um15</sup>*, *Tg(cmyb:EGFP)<sup>z169</sup>*, *Tg(kdrl:RFP)<sup>la4</sup>*, and *dlc<sup>tit446/tit446</sup>* (S. Holley) were maintained, crossed, injected, raised, and staged as described<sup>30</sup>, and in accordance with IACUC guidelines. The new line *Tg(tp1-MmHbb:Kaede)<sup>um15</sup>* was generated by Tol2-mediated transgenic insertion of a transgene containing a previously described Notch-responsive promoter<sup>31</sup> driving *Kaede* expression. Heat shocks were performed at the times indicated for 45 mins. at 37°C, as previously described<sup>20</sup>.

**Cloning, constructs, probes.** Both zebrafish *wnt16* isoforms (*wnt16-001* and *wnt16-002*, Zebrafish Information Network (ZFIN)) were amplified from AB\* embryo cDNA at tailbud, 9-somite, and 24 hpf, using primers (5'UTR-Wnt16-F CAGGTGCTACATATTAGATGCAGTGG, Wnt16-var-F GACATGGATAATACCGGTTGTGGG, and zWnt16-R TTA CTTGCAGGTGTGCATGTCATTC) designed based on GenBank sequences NM\_207096 and CD751181.1 and cloned to **pCRII-TOPO-TA** (Invitrogen) according to the manufacturer's instructions. Sequenced clones conform to since deposited GenBank sequences NM\_001100046.1 (*wnt16-001*) and BC066432.1 (*wnt16-002*), with no non-silent alterations. The *wnt16-001* form was re-cloned using the primers ggatccGACATGGATAATACCGGTTGTG and ctcgagTTACTTGCAGGTGTGCATGTC to introduce 5' BamH1 and 3' Xho1 sites. *Wnt16-001* and *wnt16-002* sequences were subcloned to **pCS2+**<sup>32</sup> via BamH1/Xho1 or EcoR1 respectively. Full-length *dlc* was amplified from 16-ss AB\* cDNA using the primers, *dlc-F* (ctcgagAAGATGGCTCGTGT TTTATTAAC) and *dlc-R* (tctagaCTATACCTCAGTAGCAAACACACG), TOPO-TA cloned, confirmed by sequencing, and subcloned to **pCS2+**. **pCS2+ wnt3**, **pCS2+ dnfgfr1-eGfp** (K. Poss), and **pBS chd** (D. Kimelman) were described previously<sup>14</sup>. The following probe and expression constructs were gifts as indicated: **pCS2+ runx1** (C. Burns), **pBK-CMV scl** (L. Zon), **pBK-CMV cmyb** (L. Zon), **pBS flkl** (D. Ransom), **pBS gata1** (D. Ransom), **pCS2+ gata2** (B. Paw), **pCRII rag1** (N. Trede), **pBS dlc** (J. Lewis), **pBS dld** (B. Appel), **pCS2+ dld** (S. Holley), **pBS jag1b** (M. Pack), **pBS jag2** (M. Pack), **pCR-Script notch1a** (J.

Campos-Ortega), **pCR-Script** *notch1b* (M. Lardelli), **pCR-Script** *notch2* (B. Appel), **pCR-Script** *notch3* (M. Lardelli), **pSPORT1** *etsrp* (S. Sumanas), **pBS** *nkx2.2* (R. Karlström), **pCRII** *gli1* (R. Karlström), **pBS** *ptc2* (R. Karlström), **pBS** *ptc1* (J. Waxman), **pBS** *prdm1a* (J. Waxman). The following probe constructs were amplified *de novo* and cloned to **pCRII**-TOPO-TA (Invitrogen) using primers as indicated: **pCRII** *myod* (myod-F AAGATGGAGTTGTCGGATATCC, myod-R AGAATTTTAAAGCACTTGATAAATGG), **pCRII** *cdh5-frag* (cdh5-probe-F TGCCTCCGACAAGGATGAAA, cdh5-probe-R ACCGAGGTCCCCACTCATGT), **pCRII** *cdh17/cb903* (cb903/cdh17-F GCGGATGATACAGGAACAGG, cb903/cdh17-R CTGAAGGCAGATGAAGCCC), **pCRII** *col2a1a-frag* (col2a1a-probe-F CCACCTGGATTGACTGGACC, col2a1a-probe-R GTAGTGCTTGCATGTTCCGGTC), **pCRII** *vegfaa<sub>165</sub>* (vegfaa-long-F GTTAATTTTAGCGGATTCGACG, vegfaa-short-R GATCATCATCTTGGCTTTTCAC), **pCRII** *shha* (Bam-shha-F ggatccAAAATGCGGCTTTTGAC, shha-R1-R gaattcTCAGCTTGAGTTTACTGACATCC; subsequently subcloned to **pCS2+**), **pCRII** *foxc1a* (foxc1a-F GTCATGCAGGCGCGCTATT, foxc1a-R ctcgagTCAAAATTTGCTGCAGTCATACAC), **pCRII** *foxc1b* (foxc1b-F ggatccACGATGCAGGCGCGCTACCC, foxc1b-R TCAGAACTTGCTGCAGTCGTATAC), **pCRII** *twist1b* (twist1b-F GAGATGCCCGAAGAGCCCGCGC, twist1b-R ctcgagCTAGTGAGATGCAGACATGGACC), **pCRII** *twist2* (twist2-F GAAATGGAAGAGAGTTCTAGCTC, twist2-R ctcgagCTAGTGGGACGCAGACATCG). A *pax1* fragment corresponding exactly to the 1080 bp ORF found in NM\_001080592, which has been annotated as the zebrafish *Pax1* orthologue at NCBI Homologene (HomoloGene:4514) was amplified (R1-pax1-F gaattcAAAATGCTTTTCGTGTTTTGCAGAG, pax1-Xba-R tctagaTTACGAGGATGAGGTAGAAAGGC) from 24 hpf AB\* cDNA to generate **pCRII** *pax1*. The *pax1* gene is located on chromosome 17 and shows syntenic conservation of the 5' neighbor (*Nkx2.2* in mouse and *NKX2.2* in human). The encoded protein is 69% identical and 90% similar to mouse and human Pax1. A 5' Xho1/Cla1 fragment of **pBS** *efnb2a* (gift of C. Moens) was recloned to **pBS** to generate **pBS** *efnb2a-probe*. Digoxigenin- and fluorescein-labelled probes were generated as described

previously<sup>33</sup> using 5' cut sites and RNA polymerases as appropriate (details available on request). Embryos were mounted and photographed as described<sup>14</sup>.

**mRNA, morpholinos and injections.** 5'-G-capped mRNAs were synthesized from Not1- or Asp718-(pCS2+ dlc) linearized pCS2+ constructs as described previously<sup>14</sup>, using the mMessage mMaching kit (Ambion, Austin, TX). The following morpholino antisense oligonucleotides were synthesized by Gene Tools, LLC (Philomath, OR) and suspended as 25 mg/ml stocks in DEPC ddH<sub>2</sub>O and diluted to injection strengths: W16MO1 AGGTTAGTTCTGTCACCCACCTGTC, W16MO2 GCGTGGAATACTTACATCCAACCTTC, W16CoMO2 ("CoMO" in the text) AcGTTAGTTgTGTCAGCCAgCTcTC, dldMO2 AAACAGCTATCATTAGTCGTCCCAT<sup>19</sup>, W11MO GAAAGTTCCTGTATTCTGTCATGTC<sup>34</sup>. Injections were performed as described previously<sup>14</sup>, and 0.1% phenol red (Sigma Aldrich, St. Louis, MO) was included as an indicator. W16MO1 and W16MO2 were injected individually at 5ng and combinatorially at 2 ng W16MO1 plus 3 ng W16MO2. In all depicted cases, both morpholinos caused the representative phenotypes shown, thus embryos are labelled "W16MO". 5 or 7 ng of dldMO and W11MO were injected. 50 pg of *dlc* and/or *dld* mRNA were injected for rescue experiments.

**Genomic and phylogenetic analyses.** Alignments, genomic analyses, and phylogenetic comparisons were performed as described previously<sup>14</sup> using the following sequences Wnt16l NP\_001093516.1, mWnt16 NP\_444346.3, hWNT16a NP\_057171.2, hWNT16b NP\_476509.1, and hWNT4 NP\_110388.2 (as the outgroup). Sequencing analysis was performed with Sequencher software (GeneCodes Corp., Ann Arbor, MI).

**PCR Genotyping and RT-PCR.** Fixed, WISH-processed individual embryos had DNA isolated in lysis buffer (10mM Tris, pH 8.3, 50mM KCl, 0.3% Tween-20, 0.3% NP-40), 98°C, 10 minutes, held at 4°C to allow addition of proteinase K to a final concentration of 1 mg/ml, 18 hours at 55°C, 15 minutes at 98°C. Presence of the *UAS:NICD* transgene was assessed by PCR using the primers E1B-F CATCGCGTCTCAGCCTCAC and Notch-R CGGAATCGTTTATTGGTGTCG ( $T_m$  55°C, extension time 45 sec., 35 cycles), with *ef-1 $\alpha$ -F* GTGCTGTGCTGATTGTTGCT, *ef-1 $\alpha$ -R*

TGTATGCGCTGACTTCCTTG as a positive control ( $T_m$  56°C, extension time 30 sec., 25 cycles). For RT-PCR, RNA was isolated from groups of 30 whole embryos at the stages indicated, and cDNA prepared as described previously<sup>14</sup>. PCR on cDNA was amplified using the primers, *ef-1 $\alpha$*  (as above), *wnt16*-RT1-F ACTAAAGAGACAGCGTTCATCC, *wnt16*-RT1-R AACTCATCTTTGGTGATAGGC, *wnt16*-RT3-F TTGTGGGATACATGCAGTTCA, and *wnt16*-RT3-R CACAGCTCCTTCTGCTTGTG with Taq polymerase (Invitrogen, Philadelphia, PA) at a  $T_m$  of 56°C, extension times of 30 sec., 38 cycles. Gels were imaged as described<sup>14</sup>.

**Whole mount in situ and antibody staining.** Single and double enzymatic WISH was performed as described previously<sup>33</sup>. Double fluorescence in situs were performed according to published protocols<sup>18</sup>. Whole mount immunofluorescence was performed as described<sup>35</sup>, using anti-Myc monoclonal 9E10 antibodies at 1:200 (Covance, Princeton, NJ) and Dylight488 AffiniPure Donkey Anti-Mouse IgG secondary (Jackson Immunoresearch Laboratories, West Grove, PA) at 1:100.

**Confocal, fluorescence microscopy, photoconversion, and timelapse imaging.** Confocal images were acquired, essentially as described<sup>7</sup>. Photoconversion of Kaede proteins was performed using the Leica SP5 ROI and bleach functions on whole embryos, excluding heads, using a 405 nm laser line for 2 minutes. Kaede fluorescence was visualized using 488 nm and 543 nm laser lines. Fluorescence images of transgenic animals were acquired on a Leica DMI 6000 (Leica Microsystem, Bannockburn, IL) and timelapse images were analyzed and processed using Volocity software (Perkin-Elmer, Waltham, MA) as described previously<sup>36</sup>.

## References

30. Westerfield, M. The Zebrafish Book. *A Guide for the Laboratory Use of Zebrafish (Danio Rerio)* (University of Oregon Press, Eugene, OR, 2004).
31. Parsons, M. J. et al. Notch-responsive cells initiate the secondary transition in larval zebrafish pancreas. *Mech Dev* **126**, 898-912 (2009).
32. Turner, D. L. & Weintraub, H. Expression of achaete-scute homolog 3 in *Xenopus* embryos converts ectodermal cells to a neural fate. *Genes Dev* **8**, 1434-47 (1994).
33. Clements, W. K. & Kimelman, D. LZIC regulates neuronal survival during zebrafish development. *Dev Biol* **283**, 322-34 (2005).
34. Lele, Z., Bakkens, J. & Hammerschmidt, M. Morpholino phenocopies of the swirl, snailhouse, somitabun, minifin, silberblick, and pipetail mutations. *Genesis* **30**, 190-4 (2001).

35. Nüsslein-Volhard, C. & Dahm, R. *Zebrafish* (Oxford University Press, Oxford, 2002).
36. Bertrand, J. Y., Kim, A. D., Teng, S. & Traver, D. CD41+ cmyb+ precursors colonize the zebrafish pronephros by a novel migration route to initiate adult hematopoiesis. *Development* **135**, 1853-62 (2008).
